# Supplementary material for: Previous exposure to dengue virus is associated with increased Zika virus burden at the maternal-fetal interface in rhesus macaques
Source: PubMed Central journal article supplement (PMC8357128; doi:10.1371/journal.pntd.0009641), 2021-07-30
Supplement: pntd.0009641.s004.pdf [file pntd.0009641.s004.pdf]

## Supporting Information

### S1 Table. Maternal and Fetal Tissue and Fluid ZIKV RNA Detection

#### Supplementary Table 1. Maternal biopsy and fetal fluids

|                 | Tissue                | # positive/total tested                 |               |
|-----------------|-----------------------|-----------------------------------------|---------------|
|                 |                       | DENV-immune                             | DENV-naïve    |
| <b>Maternal</b> | Mesenteric lymph node | 0/8                                     | 1/4           |
|                 | Spleen                | 0/2<br>(042-101, 042-103 not collected) | not collected |
|                 | Liver                 | 0/2<br>(042-101, 042-103 not collected) | not collected |
| <b>Fetal</b>    | Umbilical cord plasma | 0/8                                     | 0/4           |
|                 | Fetal plasma          | 0/8                                     | 0/4           |
|                 | Amniotic fluid        | 0/7<br>(042-504 not collected)          | 0/4           |

Spleen and liver biopsies were not collected from the majority of dams in order to minimize the size of the c-section incision.
